# Supplementary material for: Effects of a combined nature-based and audio-based virtual mindfulness intervention on stress and wellbeing of COVID-19 healthcare workers: a randomized controlled trial
Source: PeerJ. 2025 May 23;13:e19109. doi: 10.7717/peerj.19109 (PMC12105617; doi:10.7717/peerj.19109)
Supplement: Supplemental Information 1 — All participants, their demographic information and their scores on both instruments. These data were used for statistical analysis to compare the different intervention groups. [file peerj-13-19109-s001.xlsx]

## Sheet: DATA FOR ANALYSIS
orig_row	exclude	participant_id	redcap_event_name	interval	part_status	group	rand_arm	age	gender	race	race_other	hispanic_latinx	marital_status	religion	religion_other	occupation	occupation_other	service_0	service_1	service_2	service_3	service_4	service_5	service_6	service_7	service_other	covid_exposure_type	covid_exposure_freq	covid_diagnosis	covid_vaccine	covid_stress_most	covid_stress_most_other	covid_stress_level	internal_satisfaction	social_support	mm_experience	mm_experience_freq	pss_score	heals_score	heals_short_score
3	0	4	first_assessment_arm_1	0	1-completed	1-Intervention	1	38	1	3		0	2	3		5		0	0	1	0	0	0	0	0		0	1	0	1	9		2	1	2	1	0	22	130	30
4	0	4	second_assessment_arm_1	1	1-completed	1-Intervention	1																															22	129	33
6	0	4	third_assessment_arm_1	2	1-completed	1-Intervention	1																															17	126	32
15	0	4	fourth_assessment_arm_1	3	1-completed	1-Intervention	1																															18	133	33
17	0	6	first_assessment_arm_1	0	1-completed	2-Control	3	42	1	3		0	0	8		8		0	0	0	1	0	0	0	0		0	4	0	1	2		4	0	1	1	0	27	95	21
18	0	6	second_assessment_arm_1	1	1-completed	2-Control	3																															26	86	19
19	0	6	third_assessment_arm_1	2	1-completed	2-Control	3																															23	91	19
21	0	8	first_assessment_arm_1	0	1-completed	1-Intervention	2	44	1	3		0	1	3		12	Speech language pathologist	0	0	1	0	0	0	0	0		0	4	1	1	9		2	2	1	1	0	22	150	40
22	0	8	second_assessment_arm_1	1	1-completed	1-Intervention	2																															21	151	40
23	0	8	third_assessment_arm_1	2	1-completed	1-Intervention	2																															23	158	42
30	0	8	fourth_assessment_arm_1	3	1-completed	1-Intervention	2																															24	154	41
31	0	11	first_assessment_arm_1	0	1-completed	2-Control	3	24	1	5		0	1	8		5		0	0	0	0	0	0	0	1	Ambulatory surgery	0	0	0	0	5		3	0	1	0		27	71	11
32	0	11	second_assessment_arm_1	1	1-completed	2-Control	3																															23	69	11
33	0	11	third_assessment_arm_1	2	1-completed	2-Control	3																															22	73	10
34	0	12	first_assessment_arm_1	0	1-completed	2-Control	3	34	1	3		0	3	3		5		0	0	0	0	1	0	0	0		0	2	0	1	1		2	1	2	1	0	17	147	40
35	0	12	second_assessment_arm_1	1	1-completed	2-Control	3																															20	125	31
36	0	12	third_assessment_arm_1	2	1-completed	2-Control	3																															21	135	32
37	0	16	first_assessment_arm_1	0	1-completed	1-Intervention	1	32	1	5		1	0	3		5		0	0	1	0	0	0	0	0		0	2	0	1	9		3	0	2	2	2	21	126	35
38	0	16	second_assessment_arm_1	1	1-completed	1-Intervention	1																															20	143	40
40	0	16	third_assessment_arm_1	2	1-completed	1-Intervention	1																															23	128	35
49	0	16	fourth_assessment_arm_1	3	1-completed	1-Intervention	1																															20	133	37
50	0	17	first_assessment_arm_1	0	1-completed	1-Intervention	2	31	1	3		1	4	8		5		0	0	0	1	0	0	0	0		0	4	0	1	9		2	0	3	0		22	108	23
51	0	17	second_assessment_arm_1	1	1-completed	1-Intervention	2																															20	97	21
52	0	17	third_assessment_arm_1	2	1-completed	1-Intervention	2																															23	98	20
60	0	17	fourth_assessment_arm_1	3	1-completed	1-Intervention	2																															19	100	22
64	0	20	first_assessment_arm_1	0	1-completed	1-Intervention	2	40	1	3		0	1	7	Catholic	5		0	0	1	0	0	0	0	0		0	3	0	1	9		2	0	2	0		28	132	36
65	0	20	second_assessment_arm_1	1	1-completed	1-Intervention	2																															20	134	37
66	0	20	third_assessment_arm_1	2	1-completed	1-Intervention	2																															21	147	38
74	0	20	fourth_assessment_arm_1	3	1-completed	1-Intervention	2																															16	142	39
75	0	21	first_assessment_arm_1	0	1-completed	2-Control	3	38	1	3		0	4	0		5		0	0	1	0	0	0	0	0		1	2	0	1	1		2	2	3	1	0	23	116	29
76	0	21	second_assessment_arm_1	1	1-completed	2-Control	3																															21	116	31
77	0	21	third_assessment_arm_1	2	1-completed	2-Control	3																															22	117	28
84	0	25	first_assessment_arm_1	0	1-completed	2-Control	3	35	1	3		0	1	3		5		0	0	1	1	0	0	0	0		0	4	0	1	9		5	0	2	1	0	26	99	20
85	0	25	second_assessment_arm_1	1	1-completed	2-Control	3																															21	98	20
86	0	25	third_assessment_arm_1	2	1-completed	2-Control	3																															23	108	22
94	0	30	first_assessment_arm_1	0	1-completed	2-Control	3	35	1	1		0	0	5		8		0	0	0	1	0	0	0	0		0	4	0	1	3		2	0	3	1	0	20	126	29
95	0	30	second_assessment_arm_1	1	1-completed	2-Control	3																															21	128	33
96	0	30	third_assessment_arm_1	2	1-completed	2-Control	3																															18	129	31
97	0	31	first_assessment_arm_1	0	1-completed	1-Intervention	2	34	1	1		0	0	7	Sikh	5		0	0	0	0	0	1	0	0		0	0	0	1	1		2	1	2	1	0	19	111	28
98	0	31	second_assessment_arm_1	1	1-completed	1-Intervention	2																															19	109	26
99	0	31	third_assessment_arm_1	2	1-completed	1-Intervention	2																															20	106	25
108	0	31	fourth_assessment_arm_1	3	1-completed	1-Intervention	2																															22	100	25
109	0	32	first_assessment_arm_1	0	1-completed	1-Intervention	1	38	1	3		0	0	3		12	Physical therapist	1	0	1	0	0	0	0	0		2	0	0	1	1		2	0	1	1	0	22	132	36
110	0	32	second_assessment_arm_1	1	1-completed	1-Intervention	1																															16	138	38
112	0	32	third_assessment_arm_1	2	1-completed	1-Intervention	1																															17	150	41
121	0	32	fourth_assessment_arm_1	3	1-completed	1-Intervention	1																															17	149	41
122	0	33	first_assessment_arm_1	0	1-completed	2-Control	3	32	0	7		0	1	5		8		0	0	1	0	0	0	0	0		0	1	0	1	9		2	1	1	1	1	22	147	38
123	0	33	second_assessment_arm_1	1	1-completed	2-Control	3																															22	140	37
124	0	33	third_assessment_arm_1	2	1-completed	2-Control	3																															22	126	31
125	0	34	first_assessment_arm_1	0	1-completed	2-Control	3	36	1	3		0	1	3		3		1	0	0	0	0	0	1	0		2	1	0	1	0		4	1	1	1	0	22	124	29
126	0	34	second_assessment_arm_1	1	1-completed	2-Control	3																															20	131	32
127	0	34	third_assessment_arm_1	2	1-completed	2-Control	3																															22	125	32
128	0	35	first_assessment_arm_1	0	1-completed	2-Control	3	23	1	1		0	0	1		0		0	0	1	0	0	0	0	0		0	3	0	1	9		4	2	2	1	0	23	116	32
129	0	35	second_assessment_arm_1	1	1-completed	2-Control	3																															23	123	31
130	0	35	third_assessment_arm_1	2	1-completed	2-Control	3																															21	116	31
132	0	37	first_assessment_arm_1	0	1-completed	1-Intervention	2	46	1	3		0	1	3		5		0	0	1	0	0	0	0	0		0	4	0	1	9		5	0	1	0		20	128	33
133	0	37	second_assessment_arm_1	1	1-completed	1-Intervention	2																															19	138	37
134	0	37	third_assessment_arm_1	2	1-completed	1-Intervention	2																															10	143	37
138	0	37	fourth_assessment_arm_1	3	1-completed	1-Intervention	2																															17	131	35
139	0	38	first_assessment_arm_1	0	1-completed	1-Intervention	2	29	1	3		0	0	3		5		0	0	1	0	0	0	0	0		0	3	0	1	1		3	0	2	0		24	100	23
140	0	38	second_assessment_arm_1	1	1-completed	1-Intervention	2																															20	116	27
141	0	38	third_assessment_arm_1	2	1-completed	1-Intervention	2																															19	126	28
149	0	38	fourth_assessment_arm_1	3	1-completed	1-Intervention	2																															21	120	29
150	0	39	first_assessment_arm_1	0	1-completed	1-Intervention	2	28	1	6	Hispanic	1	0	3		5		0	0	1	0	0	0	0	0		0	1	0	1	3		2	0	2	1	0	24	130	32
151	0	39	second_assessment_arm_1	1	1-completed	1-Intervention	2																															24	137	36
152	0	39	third_assessment_arm_1	2	1-completed	1-Intervention	2																															24	139	35
161	0	39	fourth_assessment_arm_1	3	1-completed	1-Intervention	2																															21	145	40
162	0	40	first_assessment_arm_1	0	1-completed	2-Control	3	29	1	1		0	0	0		5		0	0	1	0	0	0	0	1	OUTPATIENT INFUSION CENTER ON HOSPITAL CAMPUS	0	3	0	1	9		2	0	1	1		17	109	25
163	0	40	second_assessment_arm_1	1	1-completed	2-Control	3																															18	108	24
164	0	40	third_assessment_arm_1	2	1-completed	2-Control	3																															17	102	23
167	0	43	first_assessment_arm_1	0	1-completed	1-Intervention	2	28	1	3		0	2	0		5		0	0	1	0	0	0	0	0		1	1	1	1	9		3	0	3	1	1	20	128	30
168	0	43	second_assessment_arm_1	1	1-completed	1-Intervention	2																															20	139	34
169	0	43	third_assessment_arm_1	2	1-completed	1-Intervention	2																															23	147	37
178	0	43	fourth_assessment_arm_1	3	1-completed	1-Intervention	2																															30	138	35
184	0	47	first_assessment_arm_1	0	1-completed	2-Control	3	34	1	1		0	4	0		5		0	0	1	0	0	0	0	0		0	1	0	1	9		3	0	2	1	0	21	117	27
185	0	47	second_assessment_arm_1	1	1-completed	2-Control	3																															22	117	26
186	0	47	third_assessment_arm_1	2	1-completed	2-Control	3																															16	117	25
187	0	48	first_assessment_arm_1	0	1-completed	1-Intervention	1	26	1	1		0	0	0		1		1	0	1	0	0	0	0	1	Correctional Facility	2	1	0	1	5		2	0	1	1	0	20	86	19
188	0	48	second_assessment_arm_1	1	1-completed	1-Intervention	1																															22	89	20
190	0	48	third_assessment_arm_1	2	1-completed	1-Intervention	1																															20	84	18
199	0	48	fourth_assessment_arm_1	3	1-completed	1-Intervention	1																															23	109	29
202	0	51	first_assessment_arm_1	0	1-completed	2-Control	3	42	1	3		0	1	3		5		0	0	1	0	0	0	0	0		0	3	0	1	5		4	0	2	0		23	106	22
203	0	51	second_assessment_arm_1	1	1-completed	2-Control	3																															23	101	22
204	0	51	third_assessment_arm_1	2	1-completed	2-Control	3																															22	103	20
205	0	52	first_assessment_arm_1	0	1-completed	1-Intervention	1	40	1	3		0	2	8		5		0	0	1	0	0	1	0	1	Outpatient Surgery	0	1	1	1	1		3	1	2	2	1	17	107	24
206	0	52	second_assessment_arm_1	1	1-completed	1-Intervention	1																															24	114	28
208	0	52	third_assessment_arm_1	2	1-completed	1-Intervention	1																															20	134	33
215	0	52	fourth_assessment_arm_1	3	1-completed	1-Intervention	1																															21	124	26
216	0	53	first_assessment_arm_1	0	1-completed	1-Intervention	2	33	1	3		0	1	1		5		0	0	0	1	0	0	0	0		0	3	0	1	9		3	0	2	1	0	24	93	17
217	0	53	second_assessment_arm_1	1	1-completed	1-Intervention	2																															21	111	27
218	0	53	third_assessment_arm_1	2	1-completed	1-Intervention	2																															17	121	29
226	0	53	fourth_assessment_arm_1	3	1-completed	1-Intervention	2																															28	104	20
227	0	54	first_assessment_arm_1	0	1-completed	2-Control	3	36	0	3		0	1	1		5		0	0	1	0	0	0	0	0		0	3	0	1	5		3	1	2	1	0	21	118	28
228	0	54	second_assessment_arm_1	1	1-completed	2-Control	3																															20	117	27
229	0	54	third_assessment_arm_1	2	1-completed	2-Control	3																															20	112	25
237	0	59	first_assessment_arm_1	0	1-completed	1-Intervention	2	29	1	1		0	0	0		11		0	0	1	0	0	0	0	0		0	1	1	1	9		3	2	1	1	0	22	95	22
238	0	59	second_assessment_arm_1	1	1-completed	1-Intervention	2																															24	111	28
239	0	59	third_assessment_arm_1	2	1-completed	1-Intervention	2																															26	101	27
248	0	59	fourth_assessment_arm_1	3	1-completed	1-Intervention	2																															21	109	27
249	0	60	first_assessment_arm_1	0	1-completed	1-Intervention	2	29	1	3		0	1	3		5		0	0	1	0	0	0	0	0		0	2	0	1	9		3	0	2	0		19	117	28
250	0	60	second_assessment_arm_1	1	1-completed	1-Intervention	2																															22	106	27
251	0	60	third_assessment_arm_1	2	1-completed	1-Intervention	2																															24	112	29
260	0	60	fourth_assessment_arm_1	3	1-completed	1-Intervention	2																															24	109	26
261	0	61	first_assessment_arm_1	0	1-completed	1-Intervention	1	43	1	3		0	0	3		5		1	0	0	0	0	0	0	0		2	2	1	0	2		2	0	1	2	2	23	140	39
262	0	61	second_assessment_arm_1	1	1-completed	1-Intervention	1																															25	140	40
264	0	61	third_assessment_arm_1	2	1-completed	1-Intervention	1																															24	153	42
273	0	61	fourth_assessment_arm_1	3	1-completed	1-Intervention	1																															22	148	40
278	0	66	first_assessment_arm_1	0	1-completed	1-Intervention	1	38	1	5		0	0	3		11		1	0	1	0	1	1	1	1	Residential and acute mental health programs, intensive rehabilitation programs	2	1	0	1	1		3	2	3	1	1	26	145	40
279	0	66	second_assessment_arm_1	1	1-completed	1-Intervention	1																															21	168	45
281	0	66	third_assessment_arm_1	2	1-completed	1-Intervention	1																															22	164	43
290	0	66	fourth_assessment_arm_1	3	1-completed	1-Intervention	1																															23	165	45
292	0	68	first_assessment_arm_1	0	1-completed	2-Control	3	40	1	3		0	2	3		5		0	0	1	0	0	0	0	0		2	1	1	1	2		3	0	1	1	0	27	119	31
293	0	68	second_assessment_arm_1	1	1-completed	2-Control	3																															20	119	30
294	0	68	third_assessment_arm_1	2	1-completed	2-Control	3																															20	118	31
300	0	72	first_assessment_arm_1	0	1-completed	1-Intervention	2	33	1	3		0	0	6		5		0	0	1	0	0	0	0	0		0	1	1	1	9		2	2	2	1	0	18	113	27
301	0	72	second_assessment_arm_1	1	1-completed	1-Intervention	2																															19	93	21
302	0	72	third_assessment_arm_1	2	1-completed	1-Intervention	2																															20	80	18
311	0	72	fourth_assessment_arm_1	3	1-completed	1-Intervention	2																															14	81	17
312	0	73	first_assessment_arm_1	0	1-completed	1-Intervention	1	45	1	2		0	1	3		5		0	0	1	0	0	0	0	0		2	0	1	1	4		2	0	3	1	0	20	134	37
313	0	73	second_assessment_arm_1	1	1-completed	1-Intervention	1																															22	142	37
315	0	73	third_assessment_arm_1	2	1-completed	1-Intervention	1																															18	137	34
347	0	92	first_assessment_arm_1	0	1-completed	2-Control	3	35	1	3		0	1	3		6		0	0	1	0	0	0	0	0		0	4	0	1	0		4	0	2	1	0	24	124	34
348	0	92	second_assessment_arm_1	1	1-completed	2-Control	3																															20	117	31
349	0	92	third_assessment_arm_1	2	1-completed	2-Control	3																															20	127	34
350	0	93	first_assessment_arm_1	0	1-completed	2-Control	3	30	1	3		0	0	0		2		1	0	1	1	0	0	0	0		0	0	0	1	7		2	0	2	1	0	29	104	26
351	0	93	second_assessment_arm_1	1	1-completed	2-Control	3																															24	98	24
352	0	93	third_assessment_arm_1	2	1-completed	2-Control	3																															19	97	23
353	0	94	first_assessment_arm_1	0	1-completed	1-Intervention	1	37	1	3		0	0	0		5		1	0	1	0	0	0	0	0		0	2	1	1	1		2	0	1	2	1	17	127	29
354	0	94	second_assessment_arm_1	1	1-completed	1-Intervention	1																															17	129	33
356	0	94	third_assessment_arm_1	2	1-completed	1-Intervention	1																															14	123	32
365	0	94	fourth_assessment_arm_1	3	1-completed	1-Intervention	1																															22
366	0	95	first_assessment_arm_1	0	1-completed	1-Intervention	1	45	1	3		0	1	8		9		0	0	1	0	0	0	0	0		0	1	1	1	0		4	0	3	1	0	24	100	20
367	0	95	second_assessment_arm_1	1	1-completed	1-Intervention	1																															22	107	23
369	0	95	third_assessment_arm_1	2	1-completed	1-Intervention	1																															19	112	25
378	0	95	fourth_assessment_arm_1	3	1-completed	1-Intervention	1																															25	92	17
380	0	97	first_assessment_arm_1	0	1-completed	2-Control	3	33	1	3		0	4	0		6		1	0	1	0	0	0	1	0		2	1	1	1	11	The profound effects of social isolation on the mental health of patients, co-workers, community, and my own family and friends.	3	0	2	1	0	23	102	27
381	0	97	second_assessment_arm_1	1	1-completed	2-Control	3																															21	106	25
382	0	97	third_assessment_arm_1	2	1-completed	2-Control	3																															26	104	26
383	0	98	first_assessment_arm_1	0	1-completed	2-Control	3	33	1	3		1	4	1		8		1	0	1	0	0	0	0	0		0	3	1	1	1		5	0	2	1	0	25	118	24
384	0	98	second_assessment_arm_1	1	1-completed	2-Control	3																															23	106	21
385	0	98	third_assessment_arm_1	2	1-completed	2-Control	3																															27	116	24
386	0	99	first_assessment_arm_1	0	1-completed	1-Intervention	2	45	1	3		0	4	7	spiritual	6		1	0	0	0	0	0	0	1	telemedicine	2	0	1	1	9		3	0	3	2	2	22	154	42
387	0	99	second_assessment_arm_1	1	1-completed	1-Intervention	2																															19	154	40
388	0	99	third_assessment_arm_1	2	1-completed	1-Intervention	2																															21	157	42
397	0	99	fourth_assessment_arm_1	3	1-completed	1-Intervention	2																															19	156	43
404	0	105	first_assessment_arm_1	0	1-completed	1-Intervention	1	44	1	1		0	1	0		8		1	0	0	0	0	0	0	0		0	2	1	1	1		2	1	3	1	0	17	134	32
405	0	105	second_assessment_arm_1	1	1-completed	1-Intervention	1																															20	131	31
407	0	105	third_assessment_arm_1	2	1-completed	1-Intervention	1																															21	143	34
416	0	105	fourth_assessment_arm_1	3	1-completed	1-Intervention	1																															20	155	38
417	0	106	first_assessment_arm_1	0	1-completed	1-Intervention	1	45	1	3		0	1	8		5		0	0	0	0	0	0	0	1	School nurse	0	2	0	1	6		3	0	1	1	1	22	87	19
418	0	106	second_assessment_arm_1	1	1-completed	1-Intervention	1																															20	118	31
420	0	106	third_assessment_arm_1	2	1-completed	1-Intervention	1																															21	103	25
429	0	106	fourth_assessment_arm_1	3	1-completed	1-Intervention	1																															20	100	23
430	0	107	first_assessment_arm_1	0	1-completed	1-Intervention	2	28	1	3		1	0	3		5		0	0	1	0	0	0	0	0		0	3	1	1	4		2	0	3	1	0	23	120	31
431	0	107	second_assessment_arm_1	1	1-completed	1-Intervention	2																															23	127	33
432	0	107	third_assessment_arm_1	2	1-completed	1-Intervention	2																															19	136	36
441	0	107	fourth_assessment_arm_1	3	1-completed	1-Intervention	2																															19	144	39
444	0	109	first_assessment_arm_1	0	1-completed	1-Intervention	2	35	1	3		0	0	3		9		1	0	1	0	0	0	0	0		0	1	1	1	7		2	0	1	1	0	21	120	31
445	0	109	second_assessment_arm_1	1	1-completed	1-Intervention	2																															20	133	32
446	0	109	third_assessment_arm_1	2	1-completed	1-Intervention	2																															20	126	31
455	0	109	fourth_assessment_arm_1	3	1-completed	1-Intervention	2																															22	129	30
466	0	118	first_assessment_arm_1	0	1-completed	1-Intervention	1	35	1	1		0	1	0		11		1	0	0	0	0	0	0	0		0	3	1	1	4		3	2	1	1	0	18	121	30
467	0	118	second_assessment_arm_1	1	1-completed	1-Intervention	1																															22	113	27
469	0	118	third_assessment_arm_1	2	1-completed	1-Intervention	1																															23	117	30
471	0	119	first_assessment_arm_1	0	1-completed	1-Intervention	2	43	0	3		0	1	7	Church of Jesus Christ of Latter Day Saints	5		0	1	1	0	0	0	0	0		0	3	1	1	9		3	1	2	1	0	25	125	35
472	0	119	second_assessment_arm_1	1	1-completed	1-Intervention	2																															22	153	40
473	0	119	third_assessment_arm_1	2	1-completed	1-Intervention	2																															21	146	41
476	0	120	first_assessment_arm_1	0	1-completed	1-Intervention	1	36	1	3		0	0	6		8		0	0	1	0	0	0	0	1	Public health	2	0	1	1	3		3	0	2	2	0	22	124	31
477	0	120	second_assessment_arm_1	1	1-completed	1-Intervention	1																															21	122	29
479	0	120	third_assessment_arm_1	2	1-completed	1-Intervention	1																															20	139	32
487	0	120	fourth_assessment_arm_1	3	1-completed	1-Intervention	1																															23	131	31
488	0	121	first_assessment_arm_1	0	1-completed	1-Intervention	1	38	0	1		0	1	4		8		0	0	1	0	0	0	0	0		0	1	1	1	3		2	1	3	0		28	155	42
489	0	121	second_assessment_arm_1	1	1-completed	1-Intervention	1																															20	151	38
491	0	121	third_assessment_arm_1	2	1-completed	1-Intervention	1																															27	132	36
492	0	121	fourth_assessment_arm_1	3	1-completed	1-Intervention	1																															22	135	37
493	0	122	first_assessment_arm_1	0	1-completed	1-Intervention	2	24	1	3		1	2	1		5		0	0	0	1	0	0	0	0		0	3	1	1	9		2	0	2	1	1	23	120	27
494	0	122	second_assessment_arm_1	1	1-completed	1-Intervention	2																															24	116	28
495	0	122	third_assessment_arm_1	2	1-completed	1-Intervention	2																															25	133	33
501	0	125	first_assessment_arm_1	0	1-completed	1-Intervention	2	38	1	3		0	0	0		12	Recreation Therapist	0	0	0	0	1	0	0	0		0	0	1	1	9		5	2	2	1	0	28	97	27
502	0	125	second_assessment_arm_1	1	1-completed	1-Intervention	2																															28	108	29
503	0	125	third_assessment_arm_1	2	1-completed	1-Intervention	2																															20	116	30
507	0	125	fourth_assessment_arm_1	3	1-completed	1-Intervention	2																															27	83	20
508	0	126	first_assessment_arm_1	0	1-completed	1-Intervention	1	39	0	3		0	0	0		9		0	0	0	1	0	0	0	0		0	3	1	1	1		2	0	3	1	0	20	122	26
509	0	126	second_assessment_arm_1	1	1-completed	1-Intervention	1																															21	129	27
511	0	126	third_assessment_arm_1	2	1-completed	1-Intervention	1																															19	130	27
519	0	126	fourth_assessment_arm_1	3	1-completed	1-Intervention	1																															20	133	30
520	0	127	first_assessment_arm_1	0	1-completed	1-Intervention	2	45	0	1		0	2	0		6		0	0	1	1	0	1	0	0		0	3	1	1	9		4	0	2	1	2	20	102	23
521	0	127	second_assessment_arm_1	1	1-completed	1-Intervention	2																															18	107	25
522	0	127	third_assessment_arm_1	2	1-completed	1-Intervention	2																															21	118	25
531	0	127	fourth_assessment_arm_1	3	1-completed	1-Intervention	2																															11	102	23

## Sheet: DATA CODEBOOK
VARIABLE	DESCRIPTION	APPLICABLE CODES
orig_row	Original row number
exclude	Exclude participant? (See eligibility criteria)	0, No; 1, Yes
participant_id	Participant ID number
redcap_event_name	Study interval, description detail
interval	Study interval, coded	0, Baseline (Assmt-0); 1, After nature (Assmt-1); 2, After mindfulness (Assmt-2); 3, Follow-up (Assmt-3)
part_status	Participant status	1, Completed
group	Aggregate Group	1, Intervention; 2, Control
rand_arm	Randomization Arm	1, Combined; 2, Nature; 3, Control
age	How old are you?
gender	What is your gender?	0, Male; 1, Female; 3, Other; 4, Prefer not to answer
race	What is your race?	0, American Indian/Alaska Native; 1, Asian; 2, Black or African American; 3, White; 4, Native Hawaiian/Pacific Islander; 5, Mixed/Two or more; 6, Other; 7, Prefer not to answer
race_other	If other, describe
hispanic_latinx	Are you Hispanic/LatinX?	0, No; 1, Yes; 2, Prefer not to answer
marital_status	What is your marital status?	0, Single; 1, Married; 2, Divorced/Separated; 3, Widowed; 4, Living with partner; 5, Other; 6, Prefer not to answer
marital_status_other	If other, describe
religion	What is your religion?	0, Agnostic | 1, Atheist; 2, Buddhism; 3, Christianity; 4, Hinduism; 5, Islam; 6, Judaism; 7, Other; 8, Prefer not to answer
religion_other	If other, describe
occupation	What is your occupation?	0, CAN; 1, Dietician; 2, Intern/Resident/Fellow; 3, Medical Assistant; 4, Medical Student; 5, Nurse; 6, Nurse Practitioner; 7, Paramedic/EMT; 8, Physician; 9, Physician Assistant; 10, Respiratory Therapist; 11, Social Worker; 12, Other
occupation_other	If other, describe
<service>	In which setting do you provide service? Select all that apply.
service_0	Clinic	0, No; 1, Yes; 2, Prefer not to answer
service_1	Hospice	0, No; 1, Yes; 2, Prefer not to answer
service_2	Hospital	0, No; 1, Yes; 2, Prefer not to answer
service_3	HospitalEmergencyRoom	0, No; 1, Yes; 2, Prefer not to answer
service_4	NursingHome	0, No; 1, Yes; 2, Prefer not to answer
service_5	PatientResidence	0, No; 1, Yes; 2, Prefer not to answer
service_6	UrgentCare	0, No; 1, Yes; 2, Prefer not to answer
service_7	Other	0, No; 1, Yes; 2, Prefer not to answer
service_other	If other, describe
covid_exposure_type	How do you characterize your COVID-19 exposure?	0, Direct exposure; 1, Indirect exposure; 2, Both
covid_exposure_freq	How frequently are you exposed to patients with COVID-19?	0, Rarely (every few months); 1, Occassionally (every few weeks); 2, Frequently (weekly); 3, Often (few days a week); 4, Daily
covid_diagnosis	Have you ever been infected with COVID-19?	0, No; 1, Yes; 2, Prefer not to answer
covid_vaccine	Have you been vaccinated for COVID-19?	0, No; 1, Yes; 2, Prefer not to answer
covid_stress_most	Of all of these options, which one was the MOST stressful? Please select one.	0, Concern about getting infected; 1, Concern about infecting others; 2, Social distancing/isolation; 3, COVID-19 illness in someone close to me (member of my household, family, friend, colleague); 4, Death due to COVID-19 of someone close to me (member of my household, family, friend, colleague); 5, Witnessed or heard about patient death from COVID-19; 6, Insufficient support from workplace (lac…							colleague) | 4	Death due to COVID-19 of someone close to me (member of my household	family	friend	colleague) | 5	Witnessed or heard about patient death from COVID-19 | 6	Insufficient support from workplace (lack of Personal Protective Equipment	emotional support	etc) | 7	Pressures of keeping up/following new procedural guidelines or use of new technology in caring for patients with COVID-19 | 8	Constant news and statistics regarding COVID-19 | 9	Emotional strain	feeling overwhelmed	physical exhaustion	COVID fatigue | 10	Vaccination status (in me	in others	variants	availability	etc) | 11	Other (describe)" y
covid_stress_most_other	If other, describe	please describe." [covid_stress_most]=11 y
covid_stress_level	Altogether, how much stress has the COVID-19 pandemic caused you?	0, No stress; 1, Mild; 2, Moderate; 3, Severe; 4, Very severe; 5, Extreme
internal_satisfaction	Since the COVID-19 pandemic, the meaning and internal satisfaction in your work ________?	0, Decreased; 1, Stayed the same; 2, Increased
social_support	What is your current level of social support (family, friends, community, religion/spirituality, other)?	0, No support; 1, Some support; 2, Good support; 3, Excellent support
mm_experience	How much experience have you had with mindfulness and meditation?	0, No experience; 1, Some experience; 2, A lot of experience
mm_experience_freq	If any experience, how often do you practice?	0, Occasionally; 1, Frequently; 3, Daily
pss_score	PSS, Perceived Stress Scale, total score
heals_score	NIH-HEALS, National Institutes of Health – Healing Experience of All Life Stressors (NIH-HEALS), total score
